# Supplementary material
Source: MDPI journal article supplement (https://www.mdpi.com/2673-1924/5/2/15)
Supplement: s1 [file s1]

## Supplementary material: TABLES

**Table S1.** Univariate PERMANOVAs of main habitats features. df= degree freedom, SC= sum of squares, Pr>(F)= p-value, \*= Significance.

|                       | <i>P. oceanica</i>                                         |        |        | <i>C. nodosa</i>                                                          |       |         | <i>C. prolifera</i>                              |       |         | Sand                                                                                             |       |         |
|-----------------------|------------------------------------------------------------|--------|--------|---------------------------------------------------------------------------|-------|---------|--------------------------------------------------|-------|---------|--------------------------------------------------------------------------------------------------|-------|---------|
|                       | df                                                         | SC     | Pr(>F) | df                                                                        | SC    | Pr (>F) | df                                               | SC    | Pr (>F) | df                                                                                               | SC    | Pr (>F) |
| <b>Lo</b>             | 2                                                          | 5.688  | 0.001* | 2                                                                         | 4.928 | 0.001*  | 2                                                | 1.584 | 0.001*  | 2                                                                                                | 2.615 | 0.001*  |
| <b>Se</b>             | 1                                                          | 0.456  | 0.029* | 1                                                                         | 2.311 | 0.001*  | 1                                                | 0.067 | 0.056   | 1                                                                                                | 2.721 | 0.001*  |
| <b>LoxSe</b>          | 2                                                          | 0.673  | 0.039* | 2                                                                         | 0.855 | 0.004*  | 2                                                | 0.133 | 0.037*  | 2                                                                                                | 0.392 | 0.112   |
| <b>Ti(Se)</b>         | 4                                                          | 0.234  | 0.694  | 4                                                                         | 1.524 | 0.002*  | 4                                                | 0.158 | 0.108   | 4                                                                                                | 0.791 | 0.077   |
| <b>LoxTi(Se)</b>      | 8                                                          | 0.852  | 0.390  | 8                                                                         | 1.248 | 0.038*  | 8                                                | 0.315 | 0.051   | 8                                                                                                | 2.321 | 0.007*  |
| <b>Si(LoxTi(Se))</b>  | 36                                                         | 5.727  | 0.046* | 36                                                                        | 6.081 | 0.002*  | 36                                               | 4.003 | 0.001*  | 36                                                                                               | 7.129 | 0.002*  |
| <b>Residual</b>       | 108                                                        | 10.905 | -      | 108                                                                       | 7.991 | -       | 108                                              | 2.162 | -       | 108                                                                                              | 9.988 | -       |
| <b>Pairwise Lo</b>    | A ≠ N1, A ≠ N2                                             |        |        | A ≠ N1, A ≠ N2, N1 ≠ N2                                                   |       |         | A ≠ N2, N1 ≠ N2                                  |       |         | A ≠ N1, N1 ≠ N2                                                                                  |       |         |
| <b>Pairwise Se</b>    | -                                                          |        |        | Winter ≠ Spring                                                           |       |         | -                                                |       |         | Winter ≠ Spring                                                                                  |       |         |
| <b>Pairwise LoxEp</b> | A:W ≠ N1:W, A:W ≠ N2:W, A:W ≠ N1:S, A:W ≠ N2:S, A:S ≠ N1:S |        |        | A:W ≠ N1:S, N1:W ≠ N1:S, N2:W ≠ A:S, N2:W ≠ N1:S, A:S ≠ N1:S, N1:S ≠ N2:S |       |         | A:W ≠ N2:S, N1:W ≠ N2:S, A:S ≠ N2:S, N1:S ≠ N2:S |       |         | A:W ≠ A:S, A:W ≠ N2:S, N1:W ≠ A:S, N1:W ≠ N2:S, N2:W ≠ A:S, N2:W ≠ N2:S, A:S ≠ N1:S, N1:S ≠ N2:S |       |         |

**Table S2.** Univariate PERMANOVAs of the characterization of the rock. df= degree freedom, SC= sum of squares, Pr>(F)= p-value, \*= Significance

|                       | Gravel                                                                                                      |       |        | Stones                  |       |         | Blocks                                                                                         |       |         | Cavities                                          |       |         | Verticality |       |         |
|-----------------------|-------------------------------------------------------------------------------------------------------------|-------|--------|-------------------------|-------|---------|------------------------------------------------------------------------------------------------|-------|---------|---------------------------------------------------|-------|---------|-------------|-------|---------|
|                       | df                                                                                                          | SC    | Pr(>F) | df                      | SC    | Pr (>F) | df                                                                                             | SC    | Pr (>F) | df                                                | SC    | Pr (>F) | df          | SC    | Pr (>F) |
| <b>Lo</b>             | 2                                                                                                           | 8.703 | 0.001* | 2                       | 15.12 | 0.001*  | 2                                                                                              | 7.871 | 0.001*  | 2                                                 | 2.681 | 0.001*  | 2           | 0.006 | 0.209   |
| <b>Se</b>             | 1                                                                                                           | 0.094 | 0.196  | 1                       | 0.339 | 0.006*  | 1                                                                                              | 0.028 | 0.461   | 1                                                 | 3.305 | 0.001*  | 1           | 0.003 | 0.177   |
| <b>LoxSe</b>          | 2                                                                                                           | 3.085 | 0.001* | 2                       | 0.216 | 0.102   | 2                                                                                              | 0.658 | 0.002*  | 2                                                 | 1.442 | 0.001*  | 2           | 0.018 | 0.011*  |
| <b>Ti(Se)</b>         | 4                                                                                                           | 0.719 | 0.010* | 4                       | 0.771 | 0.009*  | 4                                                                                              | 0.265 | 0.188   | 4                                                 | 0.364 | 0.032*  | 4           | 0.003 | 0.869   |
| <b>LoxTi(Se)</b>      | 8                                                                                                           | 0.715 | 0.091  | 8                       | 0.454 | 0.273   | 8                                                                                              | 0.331 | 0.491   | 8                                                 | 0.539 | 0.047*  | 8           | 0.058 | 0.001*  |
| <b>Si(LoxTi(Se))</b>  | 36                                                                                                          | 8.109 | 0.001* | 36                      | 5.617 | 0.001*  | 36                                                                                             | 5.023 | 0.001*  | 36                                                | 5.062 | 0.001*  | 36          | 0.185 | 0.001*  |
| <b>Residual</b>       | 108                                                                                                         | 5.469 | -      | 108                     | 4.969 | -       | 108                                                                                            | 4.749 | -       | 108                                               | 3.432 | -       | 108         | 0.206 | -       |
| <b>Pairwise Lo</b>    | A ≠ N1, A ≠ N2, N1 ≠ N2                                                                                     |       |        | A ≠ N1, A ≠ N2, N1 ≠ N2 |       |         | A ≠ N1, A ≠ N2                                                                                 |       |         | A ≠ N1, N1 ≠ N2                                   |       |         | -           |       |         |
| <b>Pairwise Se</b>    | -                                                                                                           |       |        | -                       |       |         | -                                                                                              |       |         | Winter ≠ Spring                                   |       |         | -           |       |         |
| <b>Pairwise LoxEp</b> | A:W ≠ N1:W, A:W ≠ N2:W, A:W ≠ A:S, A:W ≠ N1:S, A:W ≠ N2:S, N1:W ≠ A:S, N1:W ≠ N2:S, A:S ≠ N1:S, N1:S ≠ N2:S |       |        | -                       |       |         | A:W ≠ N1:W, A:W ≠ N2:W, A:W ≠ N1:S, A:W ≠ N2:S, N1:W ≠ A:S, N2:W ≠ A:S, A:S ≠ N1:S, A:S ≠ N2:S |       |         | A:W ≠ N1:S, N1:W ≠ N1:S, N2:W ≠ N1:S, N1:S ≠ N2:S |       |         | -           |       |         |

**Table S3.** Univariate PERMANOVAs of the rock cover features. df= degree freedom, SC= sum of squares, Pr>(F)= p-value, \*= Significance.

|                       | <i>E. elongata</i>                                                                                        |        |        | <i>J. rubens</i>                                                                                                         |       |        | <i>O. patagonica</i>                                                                           |       |        | <i>S. spinosulus</i>                                                                                          |       |        | <i>Cystoseira sp.</i> |       |        |
|-----------------------|-----------------------------------------------------------------------------------------------------------|--------|--------|--------------------------------------------------------------------------------------------------------------------------|-------|--------|------------------------------------------------------------------------------------------------|-------|--------|---------------------------------------------------------------------------------------------------------------|-------|--------|-----------------------|-------|--------|
|                       | df                                                                                                        | SC     | Pr(>F) | df                                                                                                                       | SC    | Pr(>F) | df                                                                                             | SC    | Pr(>F) | df                                                                                                            | SC    | Pr(>F) | df                    | SC    | Pr(>F) |
| <b>Lo</b>             | 2                                                                                                         | 13.178 | 0.001* | 2                                                                                                                        | 8.765 | 0.001* | 2                                                                                              | 9.674 | 0.001* | 2                                                                                                             | 7.794 | 0.001* | 2                     | 0.455 | 0.001* |
| <b>Se</b>             | 1                                                                                                         | 0.593  | 0.001* | 1                                                                                                                        | 0.693 | 0.001* | 1                                                                                              | 0.108 | 0.054  | 1                                                                                                             | 3.118 | 0.001* | 1                     | 0.033 | 0.169  |
| <b>LoxSe</b>          | 2                                                                                                         | 1.185  | 0.001* | 2                                                                                                                        | 0.098 | 0.171  | 2                                                                                              | 0.216 | 0.026* | 2                                                                                                             | 1.702 | 0.001* | 2                     | 0.022 | 0.570  |
| <b>Ti(Se)</b>         | 4                                                                                                         | 0.281  | 0.025* | 4                                                                                                                        | 0.545 | 0.002* | 4                                                                                              | 0.306 | 0.032* | 4                                                                                                             | 0.899 | 0.001* | 4                     | 0.152 | 0.102  |
| <b>LoxTi(Se)</b>      | 8                                                                                                         | 0.562  | 0.016* | 8                                                                                                                        | 1.061 | 0.001* | 8                                                                                              | 0.612 | 0.005* | 8                                                                                                             | 2.938 | 0.001* | 8                     | 0.397 | 0.016* |
| <b>Si(LoxTi(Se))</b>  | 36                                                                                                        | 1.744  | 0.001* | 36                                                                                                                       | 7.927 | 0.001* | 36                                                                                             | 3.769 | 0.001* | 36                                                                                                            | 5.106 | 0.001* | 36                    | 2.334 | 0.001* |
| <b>Residual</b>       | 108                                                                                                       | 2.766  | -      | 108                                                                                                                      | 3.195 | -      | 108                                                                                            | 2.981 | -      | 108                                                                                                           | 2.131 | -      | 108                   | 2.127 | -      |
| <b>Pairwise Lo</b>    | A ≠ N1, A ≠ N2                                                                                            |        |        | A ≠ N1, A ≠ N2                                                                                                           |       |        | A ≠ N1, A ≠ N2                                                                                 |       |        | A ≠ N1, A ≠ N2, N1 ≠ N2                                                                                       |       |        | A ≠ N2                |       |        |
| <b>Pairwise Se</b>    | Winter ≠ Spring                                                                                           |        |        | Winter ≠ Spring                                                                                                          |       |        | -                                                                                              |       |        | Winter ≠ Spring                                                                                               |       |        | -                     |       |        |
| <b>Pairwise LoxEp</b> | A:W ≠ N1:W, A:W ≠ N2:W, A:W ≠ A:S, A:W ≠ N1:S, A:W ≠ N2:S, N1:W ≠ A:S, N2:W ≠ A:S, A:S ≠ N1:S, A:S ≠ N2:S |        |        | A:W ≠ N1:W, A:W ≠ N2:W, A:W ≠ N1:S, A:W ≠ N2:S, N1:W ≠ A:S, N1:W ≠ N1:S, N2:W ≠ A:S, N2:W ≠ N2:S, A:S ≠ N1:S, A:S ≠ N2:S |       |        | A:W ≠ N1:W, A:W ≠ N2:W, A:W ≠ N1:S, A:W ≠ N2:S, N1:W ≠ A:S, N2:W ≠ A:S, A:S ≠ N1:S, A:S ≠ N2:S |       |        | A:W ≠ N1:W, A:W ≠ N2:W, A:W ≠ N2:S, N1:W ≠ A:S, N1:W ≠ N1:S, N2:W ≠ A:S, N2:W ≠ N1:S, A:S ≠ N2:S, N1:S ≠ N2:S |       |        | -                     |       |        |

**Table S4.** Univariate PERMANOVAs of the Sparidae family df= degree freedom, SC= sum of squares, Pr>(F)= p-value, \*= Significance

|                   | <i>D. sargus</i> |       |         | <i>D. vulgaris</i>                                                       |       |         | <i>D. cervinus</i> |       |         |
|-------------------|------------------|-------|---------|--------------------------------------------------------------------------|-------|---------|--------------------|-------|---------|
|                   | df               | SC    | Pr (>F) | df                                                                       | SC    | Pr (>F) | df                 | SC    | Pr (>F) |
| Lo                | 2                | 0.027 | 0.174   | 2                                                                        | 0.212 | 0.001*  | 2                  | 0.056 | 0.009*  |
| Se                | 1                | 0.005 | 0.404   | 1                                                                        | 0.081 | 0.003*  | 1                  | 0.003 | 0.265   |
| LoxSe             | 2                | 0.026 | 0.165   | 2                                                                        | 0.061 | 0.022*  | 2                  | 0.007 | 0.523   |
| Ti(Se)            | 4                | 0.039 | 0.286   | 4                                                                        | 0.137 | 0.005*  | 4                  | 0.063 | 0.037*  |
| LoxTi(Se)         | 8                | 0.183 | 0.004*  | 8                                                                        | 0.073 | 0.383   | 8                  | 0.126 | 0.025*  |
| Si(LoxTi(Se))     | 35               | 0.549 | 0.004*  | 33                                                                       | 0.385 | 0.088   | 36                 | 0.567 | 0.028*  |
| Residual          | 94               | 0.729 | -       | 81                                                                       | 0.414 | -       | 108                | 0.672 | -       |
| Pairwise Lo       | -                |       |         | A=N1, A ≠ N2,<br>N1 ≠ N2                                                 |       |         | -                  |       |         |
| Pairwise Se       | -                |       |         | W ≠ S                                                                    |       |         | -                  |       |         |
| Pairwise<br>LoxSe | -                |       |         | N1:W ≠ A:S,<br>N1:W ≠ N1:S,<br>N2:W ≠ A:S,<br>N2:W ≠ N1:S,<br>A:S ≠ N2:S |       |         | -                  |       |         |

  

|                | <i>D. dentex</i> |       |        | <i>S. aurata</i> |       |        | <i>S. salpa</i> |       |         |
|----------------|------------------|-------|--------|------------------|-------|--------|-----------------|-------|---------|
|                | df               | SC    | Pr(>F) | df               | SC    | Pr(>F) | df              | SC    | Pr (>F) |
| Lo             | 2                | 0.001 | 0.534  | 2                | 0.008 | 0.418  | 2               | 0.038 | 0.166   |
| Se             | 1                | 0.000 | 0.430  | 1                | 0.007 | 0.346  | 1               | 0.017 | 0.206   |
| LoxSe          | 2                | 0.000 | 0.534  | 2                | 0.006 | 0.426  | 2               | 0.012 | 0.536   |
| Ti(Se)         | 3                | 0.001 | 0.239  | 3                | 0.018 | -      | 4               | 0.051 | 0.269   |
| LoxTi(Se)      | 3                | 0.001 | 0.143  | -                | -     | -      | 8               | 0.129 | 0.138   |
| Si(LoxTi(Se))  | 3                | 0.000 | 0.845  | 7                | 0.047 | 0.450  | 32              | 0.569 | 0.038*  |
| Residual       | 5                | 0.004 | -      | 2                | 0.004 | -      | 53              | 0.529 | -       |
| Pairwise Lo    | -                |       |        | -                |       |        | -               |       |         |
| Pairwise Se    | -                |       |        | -                |       |        | -               |       |         |
| Pairwise LoxSe | -                |       |        | -                |       |        | -               |       |         |

**Table S5.** Univariate PERMANOVAs of dominant species of the Labridae family species in natural rocky habitat. df= degree freedom, SC= sum of squares, Pr>(F)= p-value, \*= Significance

|                       | <i>L. viridis</i> |       |        | <i>S. rostratus</i> |       |        | <i>S. tinca</i> |       |        | <i>S. roissali</i>                |       |        | <i>S. cinereus</i> |       |        |
|-----------------------|-------------------|-------|--------|---------------------|-------|--------|-----------------|-------|--------|-----------------------------------|-------|--------|--------------------|-------|--------|
|                       | df                | SC    | Pr(>F) | df                  | SC    | Pr(>F) | df              | SC    | Pr(>F) | df                                | SC    | Pr(>F) | df                 | SC    | Pr(>F) |
| <b>Lo</b>             | 2                 | 0.033 | 0.065  | 2                   | 0.017 | 0.033* | 2               | 0.008 | 0.371  | 2                                 | 0.028 | 0.127  | 2                  | 0.044 | 0.152  |
| <b>Se</b>             | 1                 | 0.021 | 0.057  | 1                   | 0.034 | 0.001* | 1               | 0.005 | 0.301  | 1                                 | 0.153 | 0.001* | 1                  | 0.022 | 0.149  |
| <b>LoxSe</b>          | 1                 | 0.003 | 0.454  | 2                   | 0.005 | 0.387  | 2               | 0.005 | 0.552  | 2                                 | 0.035 | 0.073  | 2                  | 0.103 | 0.019* |
| <b>Ti(Se)</b>         | 4                 | 0.031 | 0.215  | 4                   | 0.012 | 0.278  | 4               | 0.006 | 0.801  | 4                                 | 0.042 | 0.176  | 4                  | 0.021 | 0.784  |
| <b>LoxTi(Se)</b>      | 5                 | 0.054 | 0.119  | 1                   | 0.004 | 0.202  | 4               | 0.005 | 0.896  | 8                                 | 0.028 | 0.836  | 7                  | 0.063 | 0.625  |
| <b>Si(LoxTi(Se))</b>  | 5                 | 0.026 | 0.383  | 12                  | 0.089 | 0.009* | 14              | 0.022 | 0.966  | 36                                | 0.389 | 0.040* | 28                 | 0.149 | 0.981  |
| <b>Residual</b>       | 10                | 0.043 | -      | 19                  | 0.043 | -      | 18              | 0.071 | -      | 93                                | 0.615 | -      | 34                 | 0.385 | -      |
| <b>Pairwise Lo</b>    | -                 |       |        | -                   |       |        | -               |       |        | -                                 |       |        | -                  |       |        |
| <b>Pairwise Se</b>    | -                 |       |        | W ≠ S               |       |        | -               |       |        | W ≠ S                             |       |        | -                  |       |        |
| <b>Pairwise LoxSe</b> | -                 |       |        | -                   |       |        | -               |       |        | A:W ≠ A:S, A:W ≠ N1:S, A:W ≠ N2:S |       |        | -                  |       |        |

**Table S6.** Univariate PERMANOVAs of the Serranidae family species and *C. auratus* and *D. labrax*. df= degree freedom, SC= sum of squares, Pr>(F)= p-value, \*= Significance

|                       | <i>S. scriba</i> |       |         | Juveniles |       |         | <i>C. auratus</i>         |       |         | <i>D. labrax</i> |       |         |
|-----------------------|------------------|-------|---------|-----------|-------|---------|---------------------------|-------|---------|------------------|-------|---------|
|                       | df               | SC    | Pr (>F) | df        | SC    | Pr (>F) | df                        | SC    | Pr (>F) | df               | SC    | Pr (>F) |
| <b>Lo</b>             | 2                | 0.037 | 0.010*  | 1         | 0.008 | 0.196   | 2                         | 0.763 | 0.002*  | 2                | 0.099 | 0.023*  |
| <b>Se</b>             | 1                | 0.011 | 0.088   | 1         | 0.043 | 0.037*  | 1                         | 0.034 | 0.402   | 1                | 0.001 | 1.000   |
| <b>LoxSe</b>          | 2                | 0.001 | 0.889   | -         | -     | -       | 2                         | 0.637 | 0.004*  | 2                | 0.001 | 1.000   |
| <b>Ti(Se)</b>         | 4                | 0.007 | 0.777   | 3         | 0.036 | 0.158   | 4                         | 0.328 | 0.178   | 4                | 0.025 | 0.812   |
| <b>LoxTi(Se)</b>      | 7                | 0.081 | 0.017*  | -         | -     | -       | 8                         | 1.599 | 0.001*  | 8                | 0.049 | 0.961   |
| <b>Si(LoxTi(Se))</b>  | 26               | 0.100 | 0.535   | 3         | 0.020 | 0.280   | 36                        | 5.016 | 0.002*  | 36               | 0.447 | 0.797   |
| <b>Residual</b>       | 42               | 0.168 | -       | 2         | 0.005 | -       | 108                       | 5.611 | -       | 108              | 1.339 | -       |
| <b>Pairwise Lo</b>    | A ≠ N2           |       |         | -         |       |         | A ≠ N1                    |       |         | -                |       |         |
| <b>Pairwise Se</b>    | -                |       |         | -         |       |         | -                         |       |         | -                |       |         |
| <b>Pairwise LoxEp</b> | -                |       |         | -         |       |         | A:S ≠ N2:S, A:S<br>≠ N1:W |       |         | -                |       |         |

**Supplementary material: FIGURES**

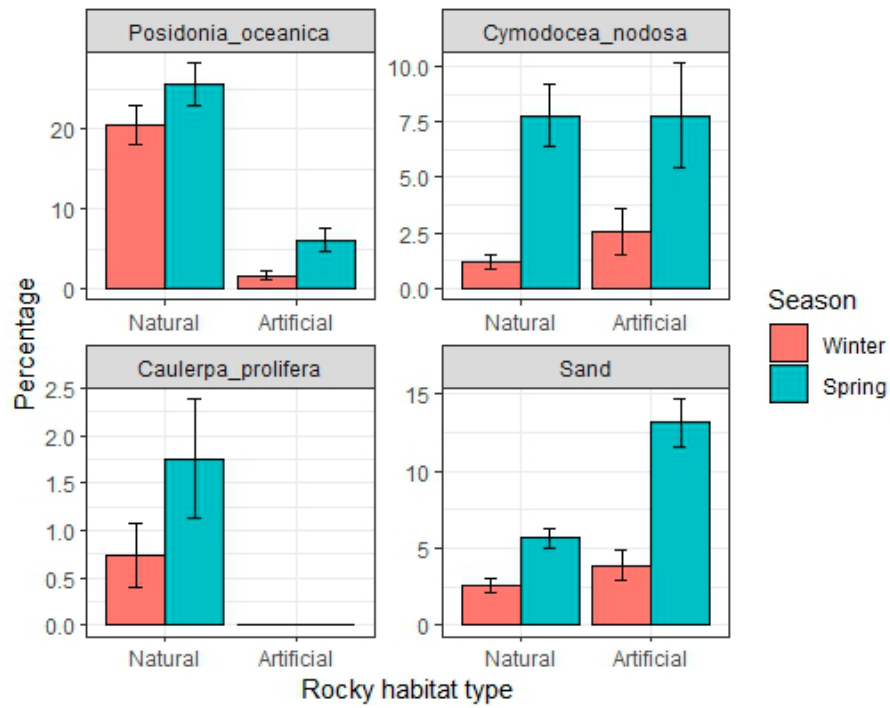

**Figure S1.** Percentage of cover of the main habitats (mean  $\pm$  standard error) surrounding the rocky habitat depending on the locations and the seasons.

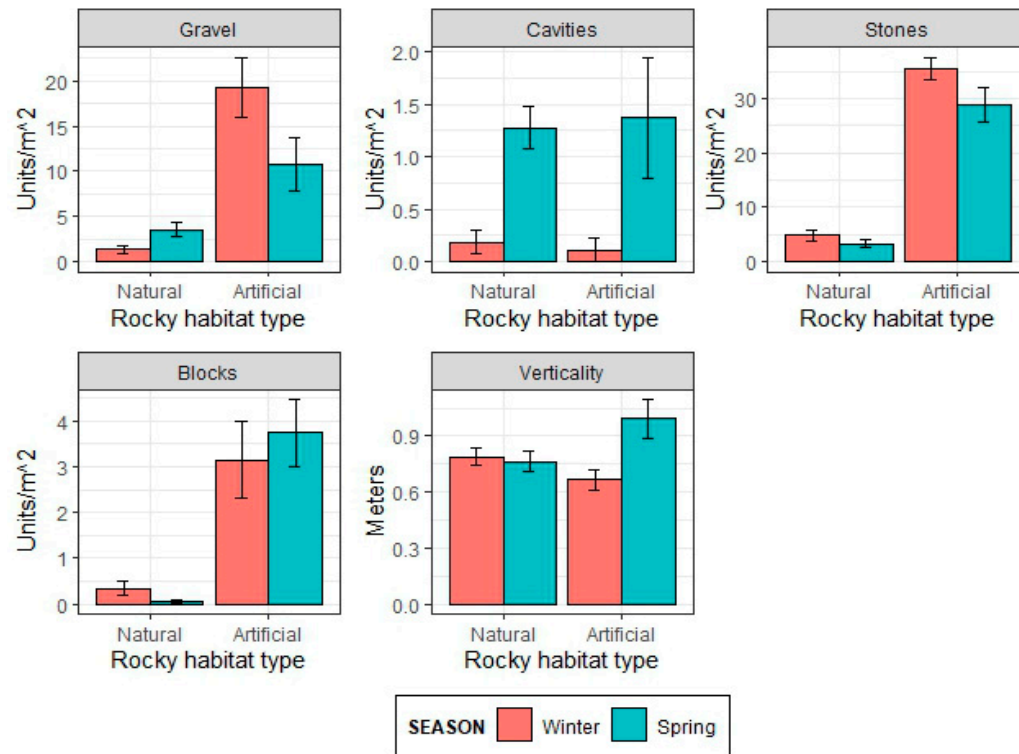

**Figure S2.** Physical variables that characterized the complexity of rocky habitat (mean  $\pm$  standard error) depending on the locations and the seasons.

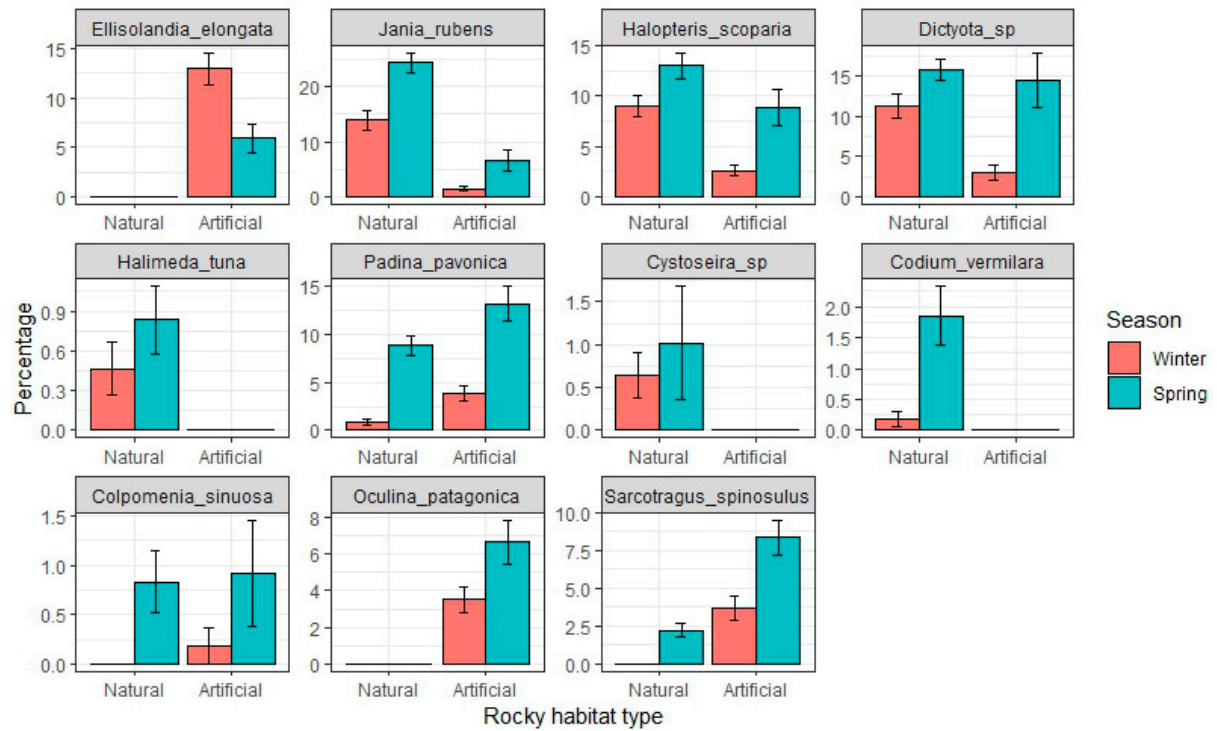

**Figure S3.** Percentage of cover of the algae and benthic animals (mean  $\pm$  standard error) over the rocky habitat depending on the locations and the seasons.



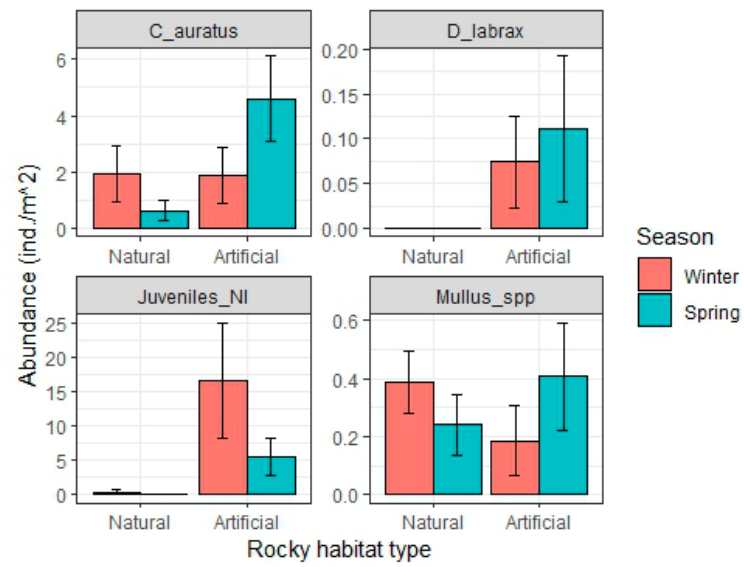

**Figure S4.** Abundance of other species (mean  $\pm$  standard error) depending on the locations and the seasons.
